# Supplementary material
Source: MDPI journal article supplement (https://www.mdpi.com/2410-3888/8/3/131)
Supplement: s1 [file s1]

Supplementary Materials

# Effects of Aging Uncertainty on the Estimation of Growth Functions of Major Tuna Species

Dongqi Lu <sup>1</sup>, Qinqin Lin <sup>1</sup>, Jiangfeng Zhu <sup>1,2,3,\*</sup> and Fan Zhang <sup>1,\*</sup>

<sup>1</sup> College of Marine Sciences, Shanghai Ocean University, Shanghai 201306, China

<sup>2</sup> Key Laboratory of Sustainable Exploitation of Oceanic Fisheries Resources, Ministry of Education, Shanghai 201306, China

<sup>3</sup> Key Laboratory of Oceanic Fisheries Exploration, Ministry of Agriculture and Rural Affairs, Shanghai 201306, China

\* Correspondence: jfzhu@shou.edu.cn (J.Z.); f-zhang@shou.edu.cn (F.Z.)

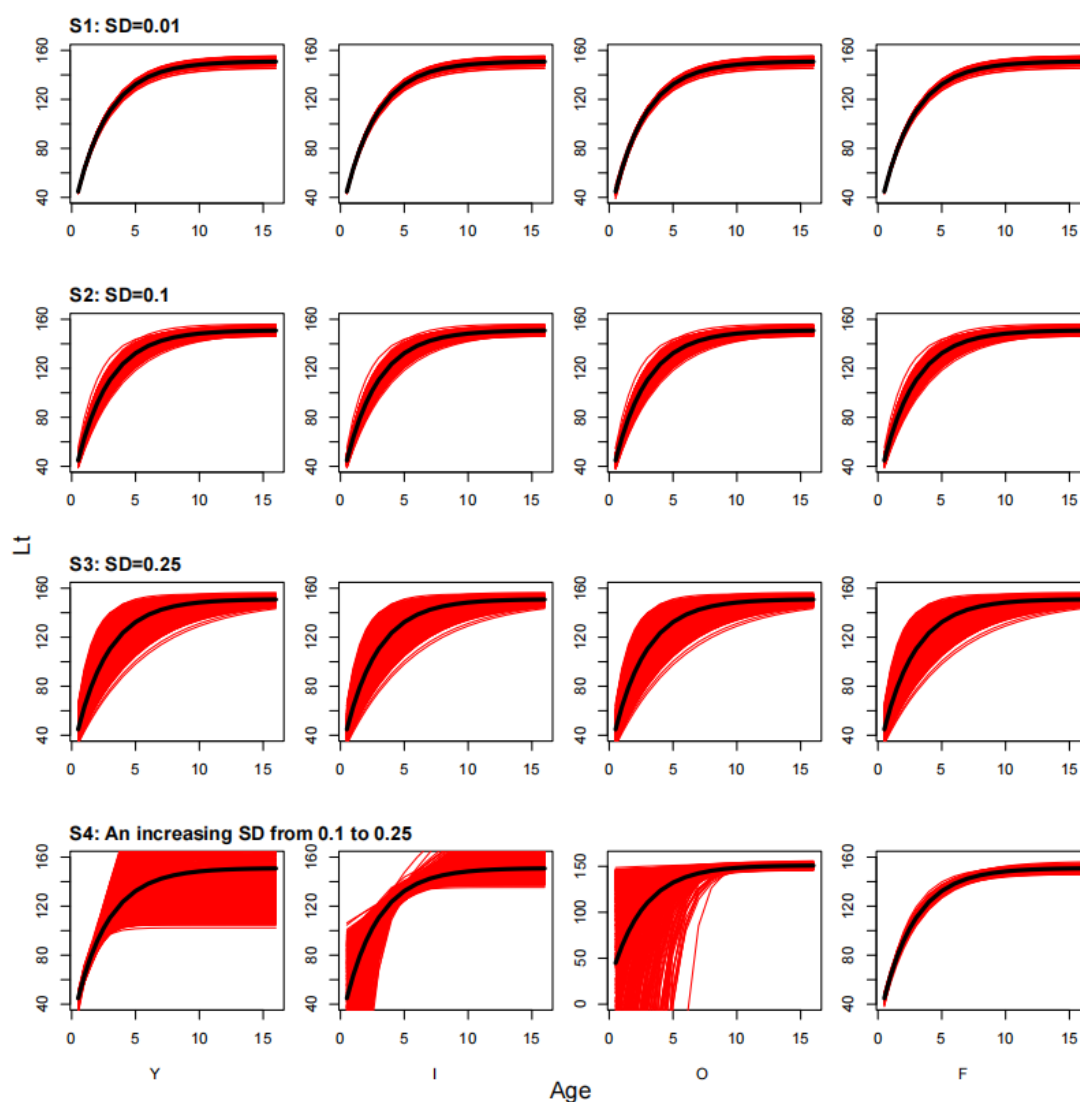

**Figure S1.** Distributions of estimated growth curve of simulated bigeye tuna.

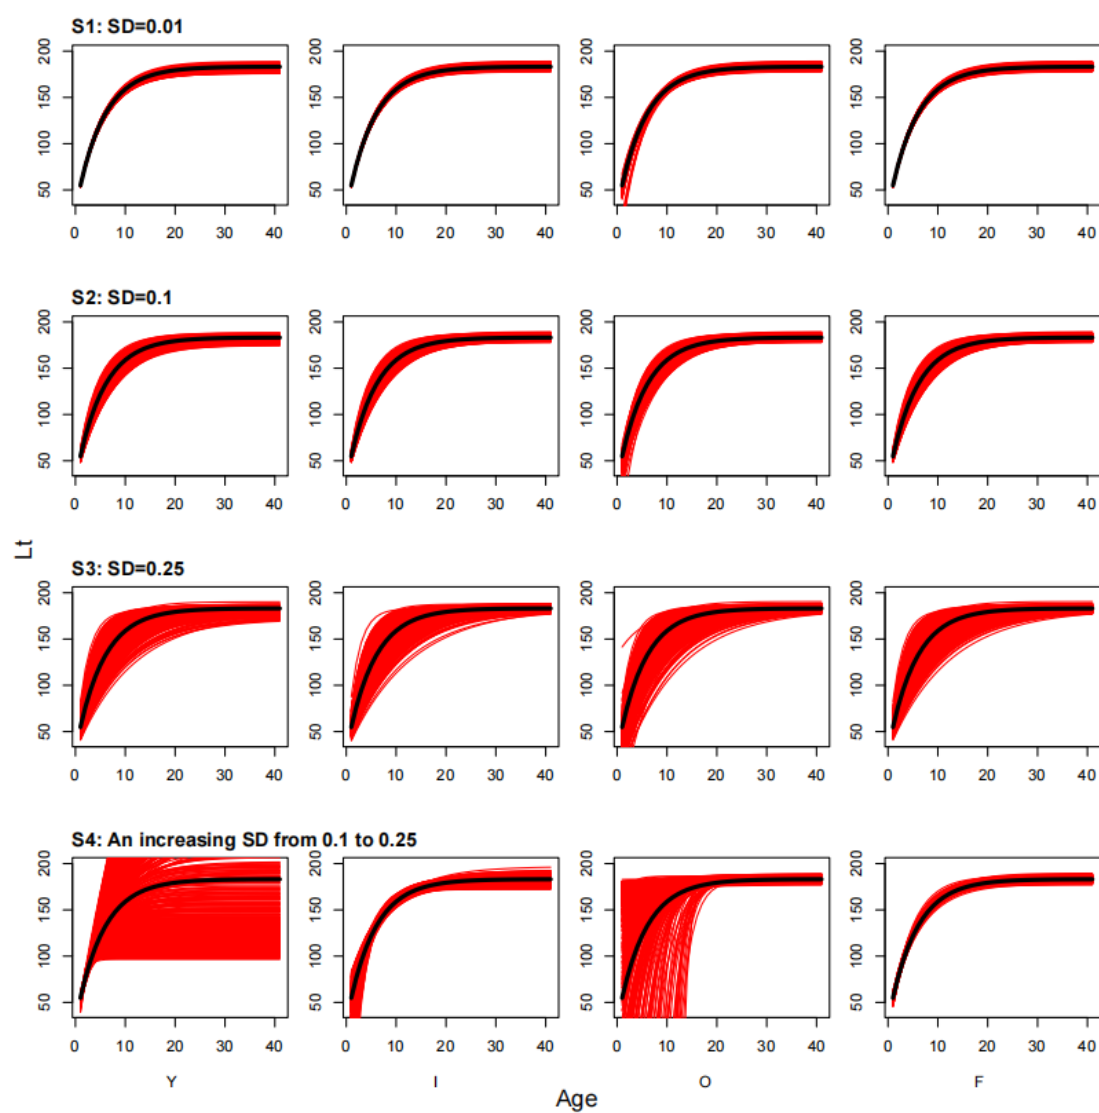

**Figure S2.** Distributions of estimated growth curve of simulated southern bluefin tuna.

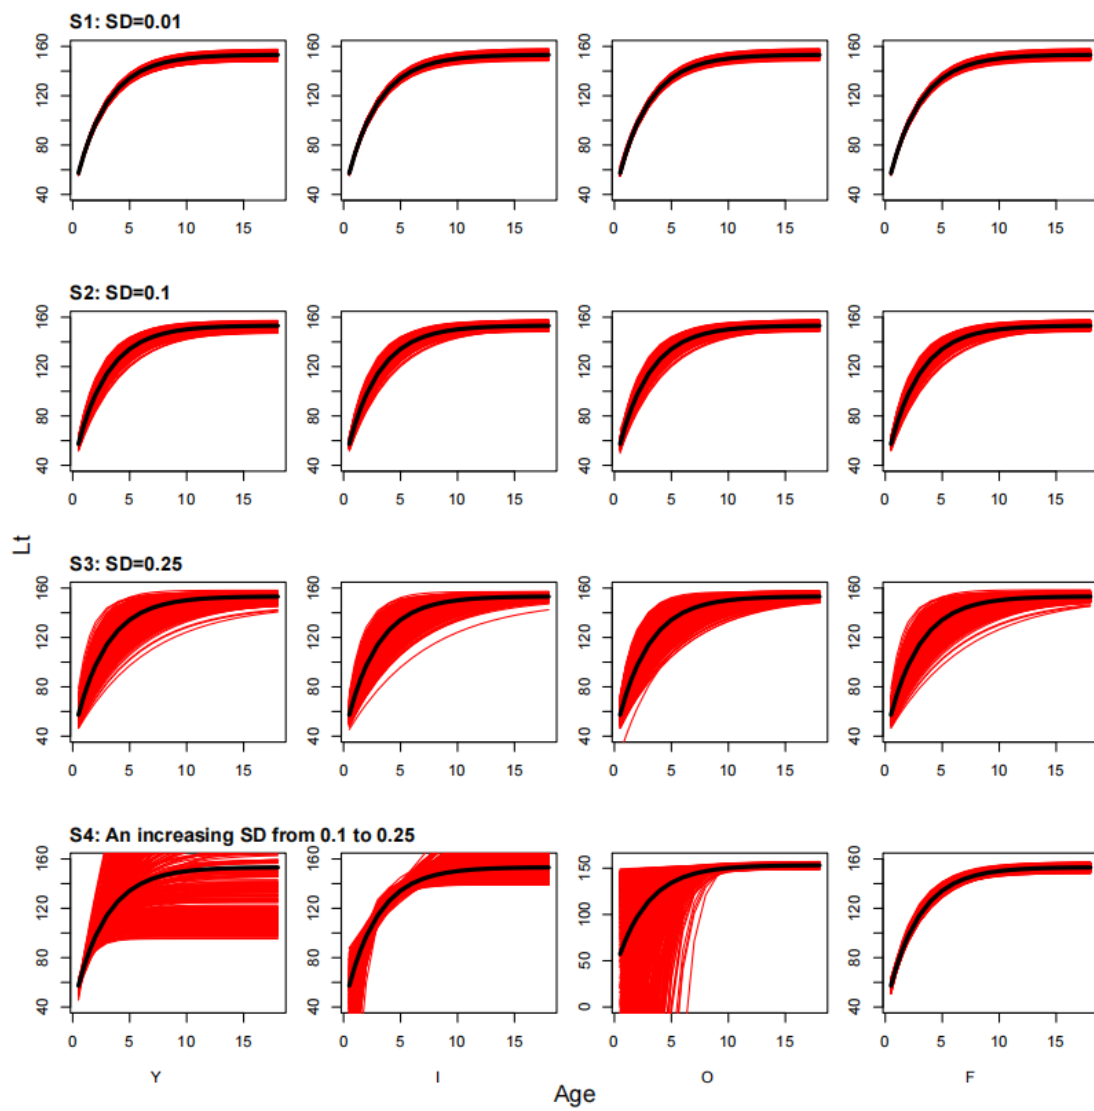

**Figure S3.** Distributions of estimated growth curve of simulated yellowfin tuna.

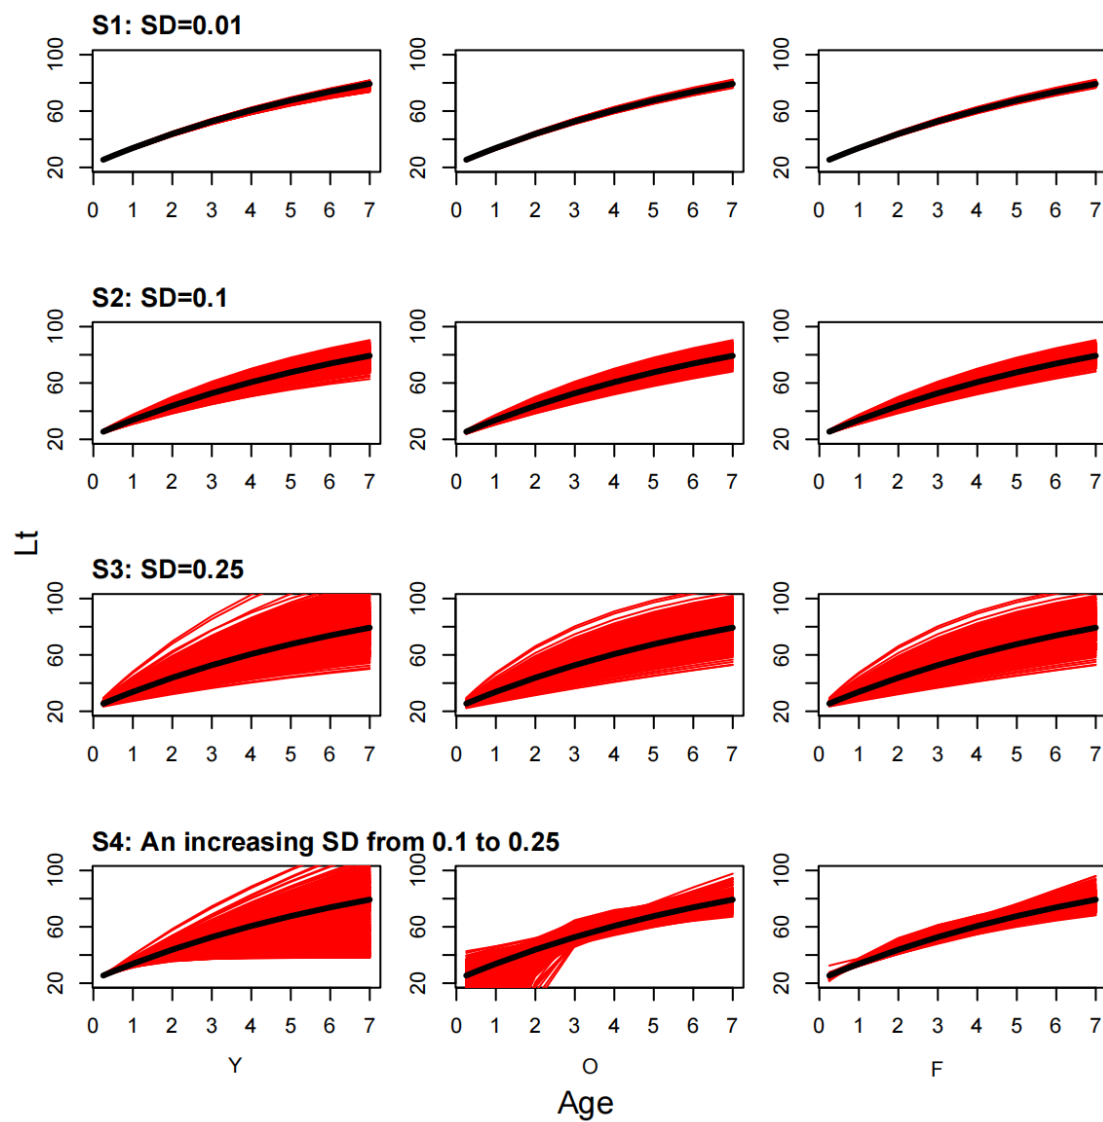

**Figure S4.** Distributions of estimated growth curve of simulated skipjack tuna.

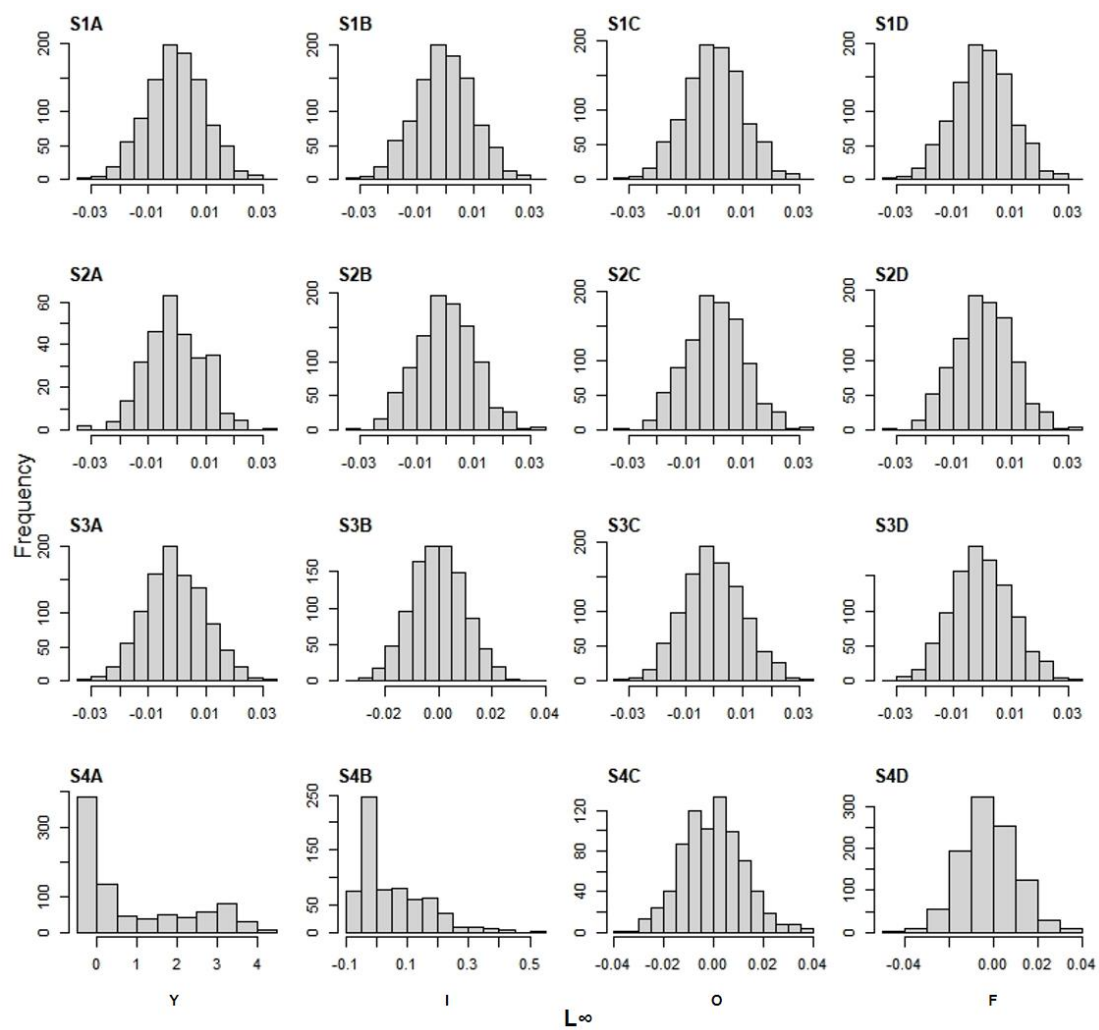

**Figure S5.** Distributions of estimated relative error of  $L_{\infty}$  of albacore tuna.

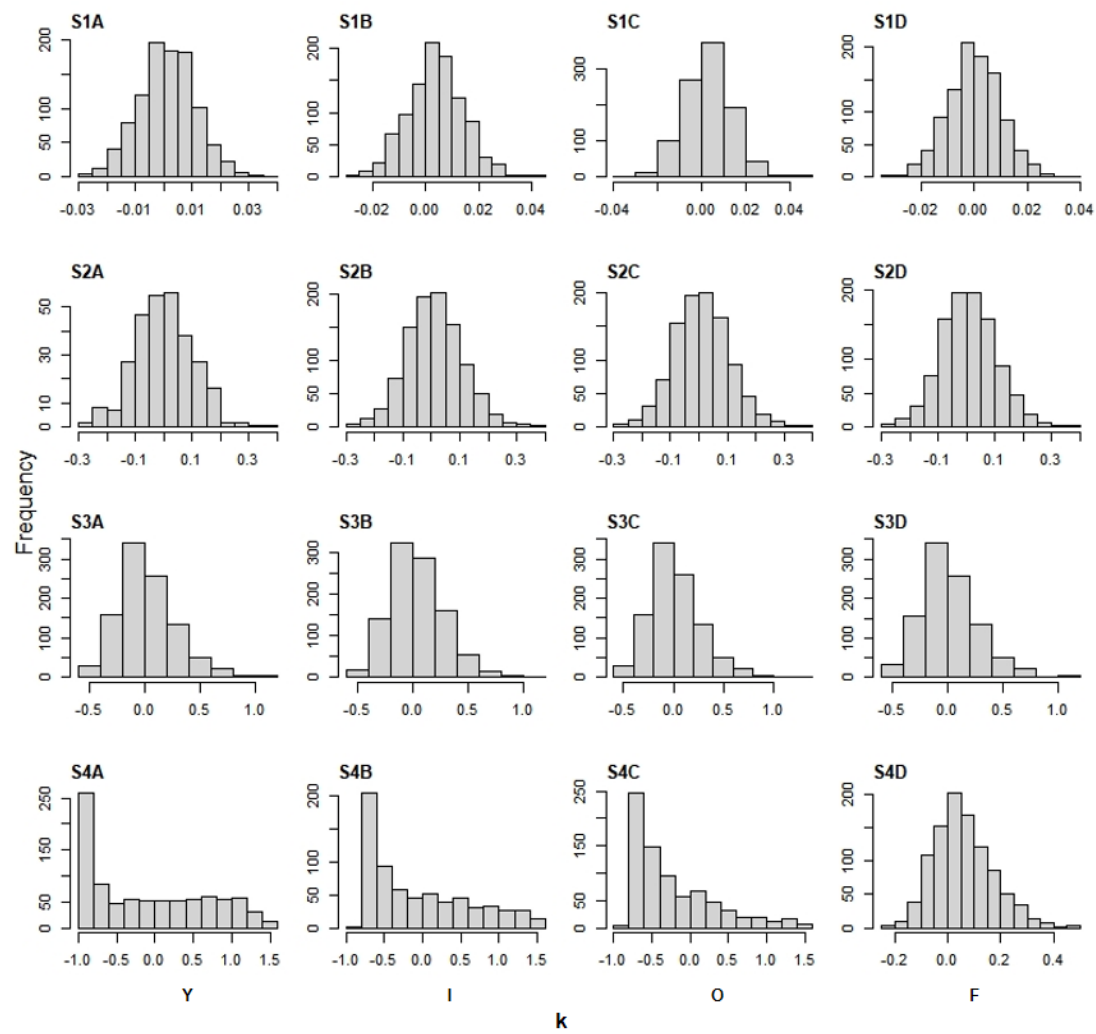

**Figure S6.** Distributions of estimated relative error of  $k$  of albacore tuna.

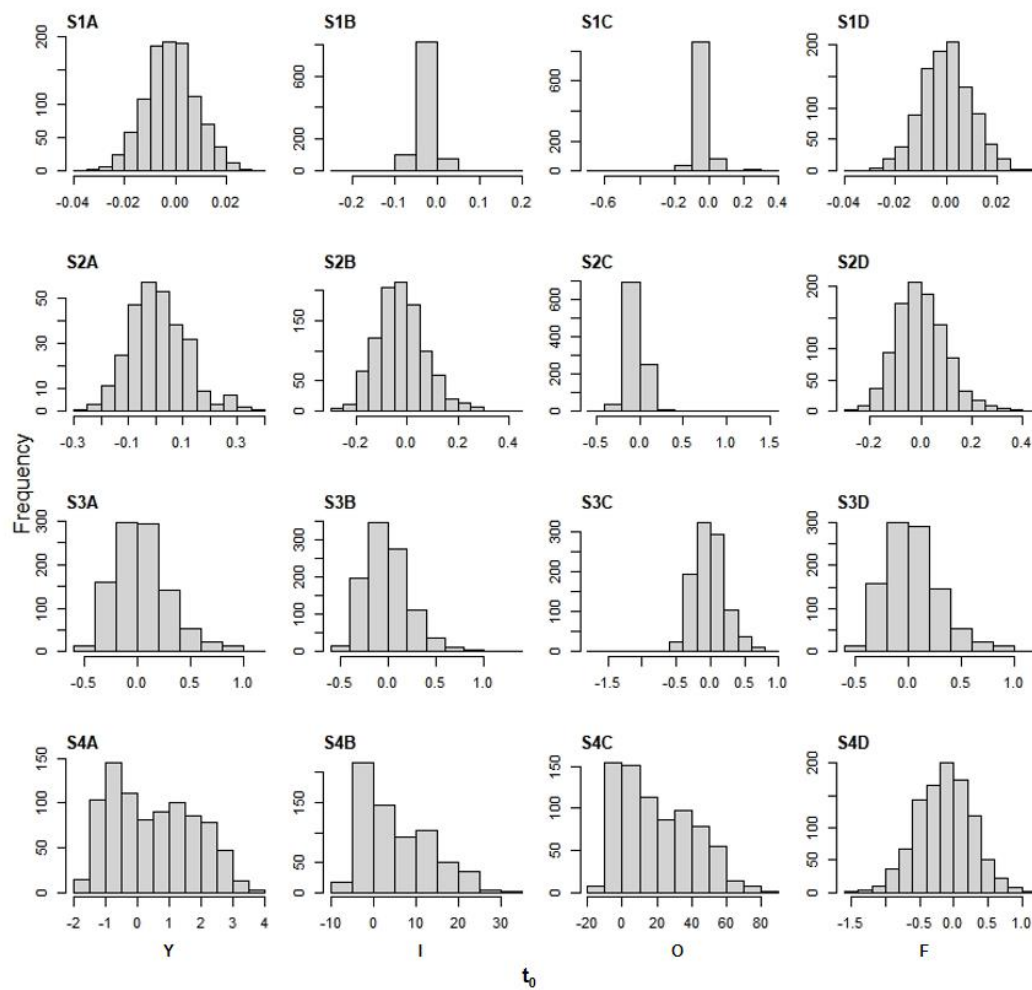

Figure S7. Distributions of estimated relative error of  $t_0$  of albacore tuna.

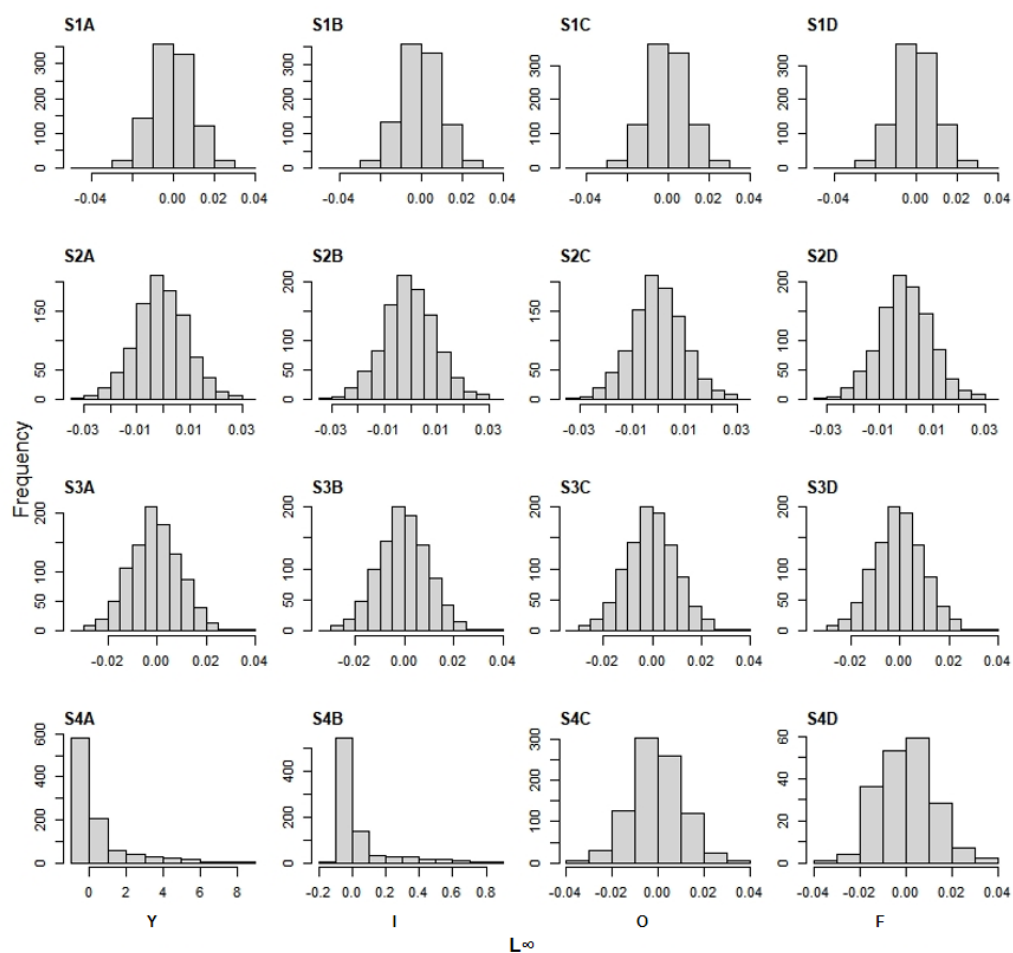

Figure S8. Distributions of estimated relative error of  $L_{\infty}$  of bigeye tuna.



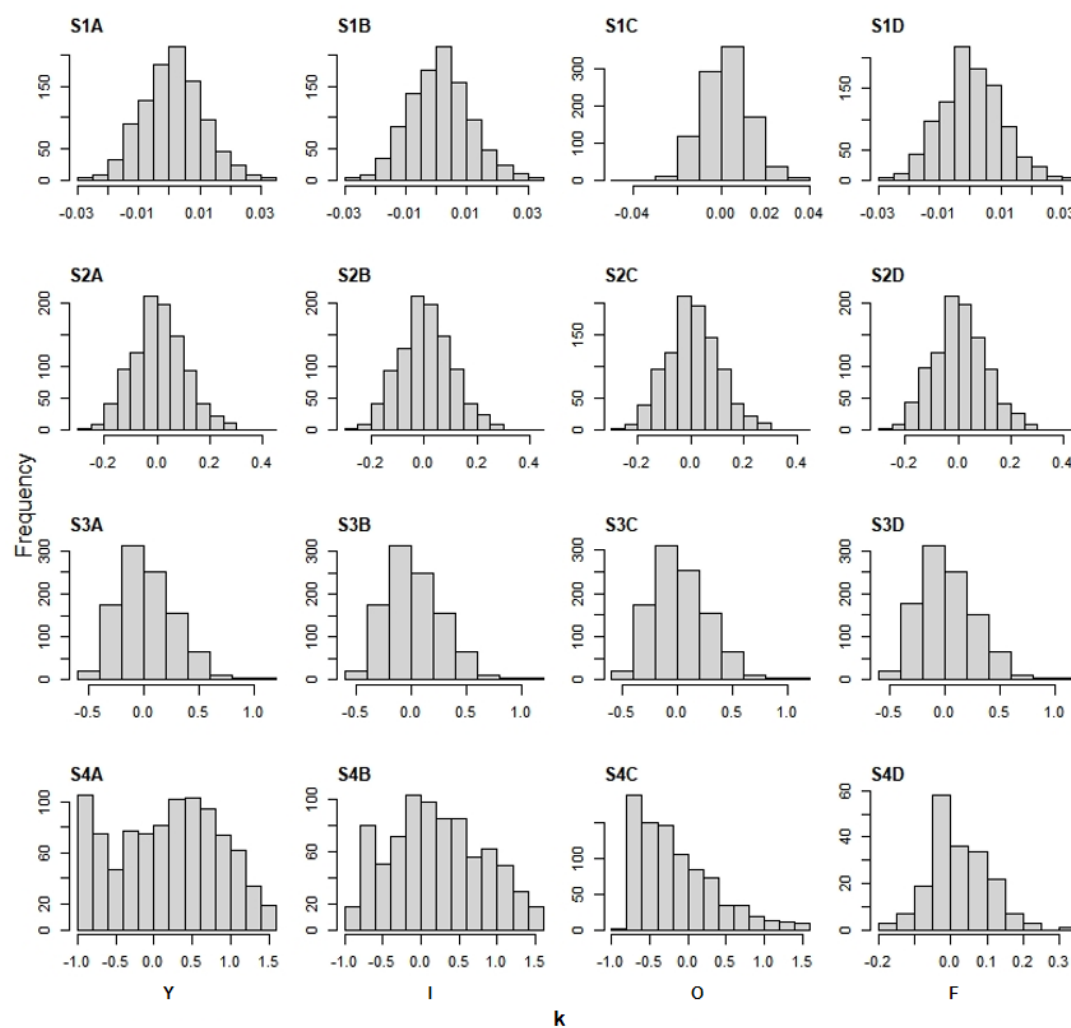

Figure S9. Distributions of estimated relative error of  $k$  of bigeye tuna.

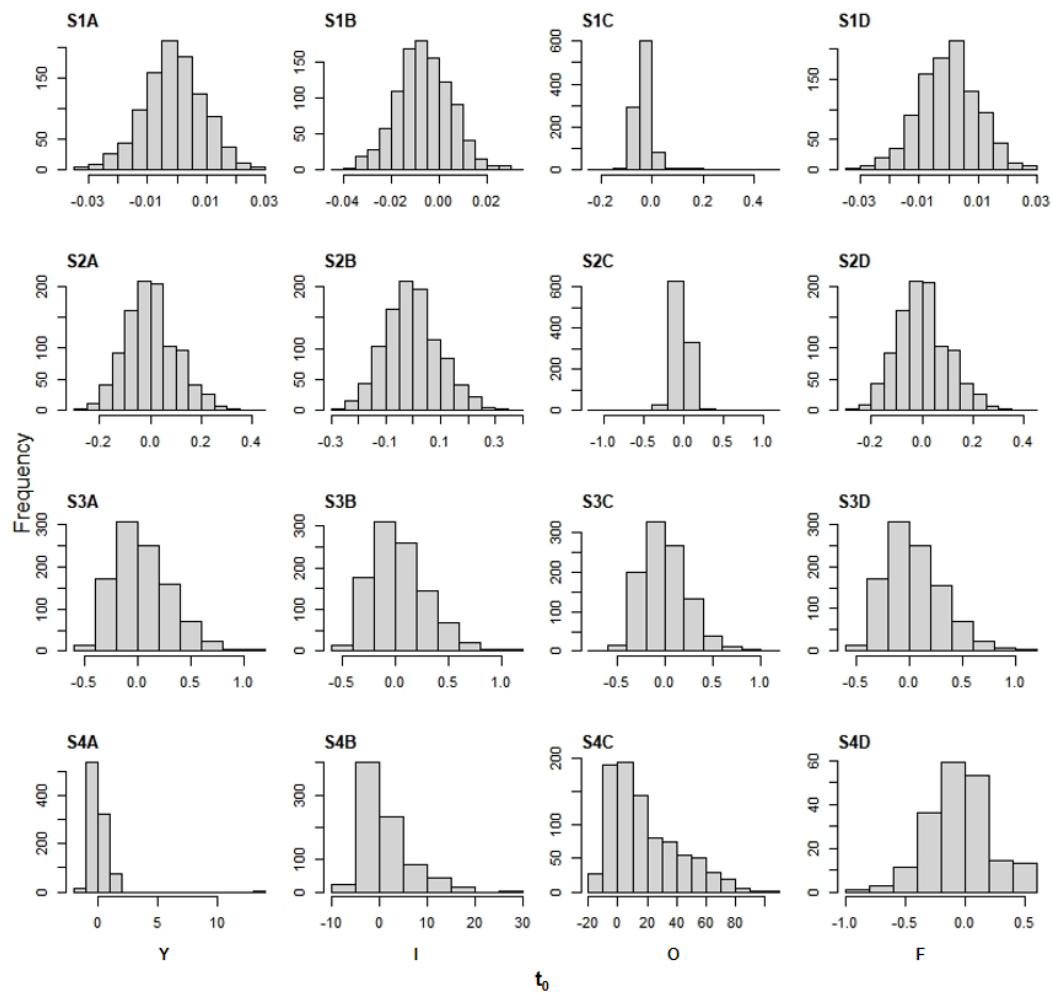

Figure S10. Distributions of estimated relative error of  $t_0$  of bigeye tuna.

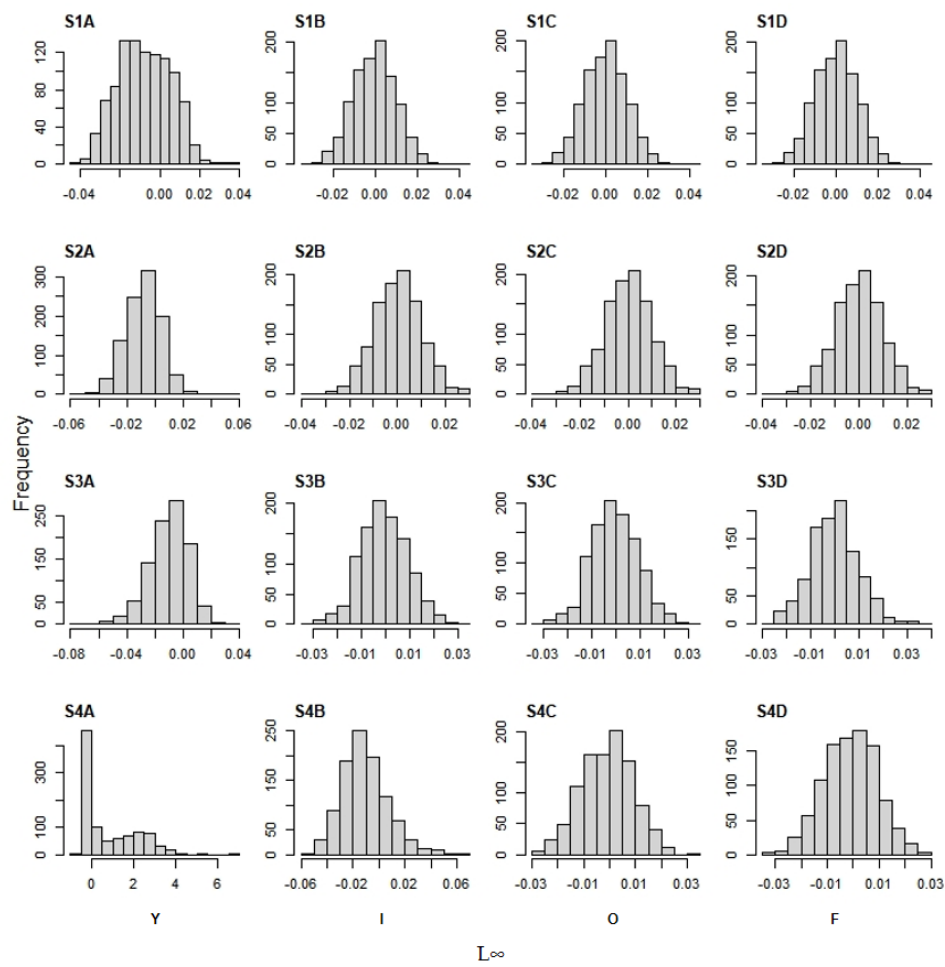

**Figure S11.** Distributions of estimated relative error of  $L_{\infty}$  of southern bluefin tuna.

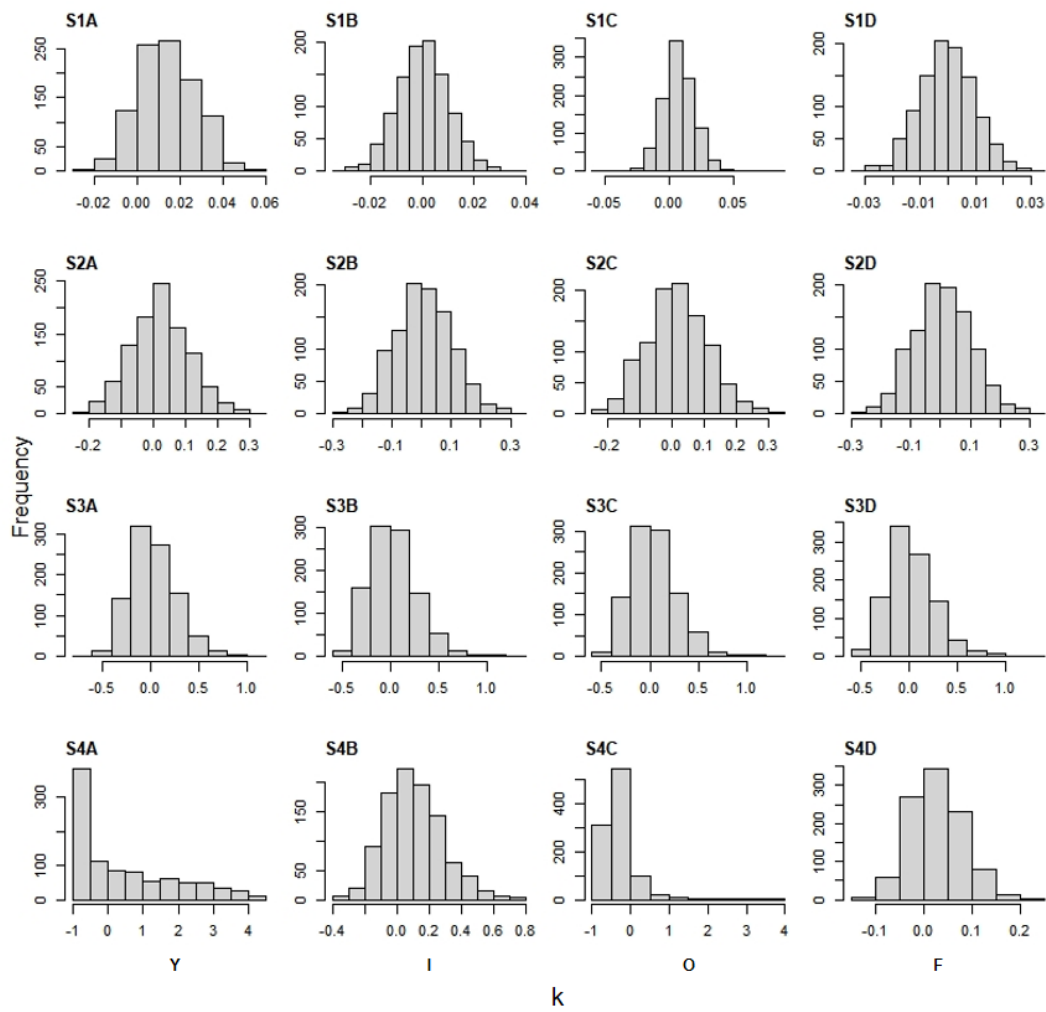

**Figure S12.** Distributions of estimated relative error of  $k$  of southern bluefin tuna.

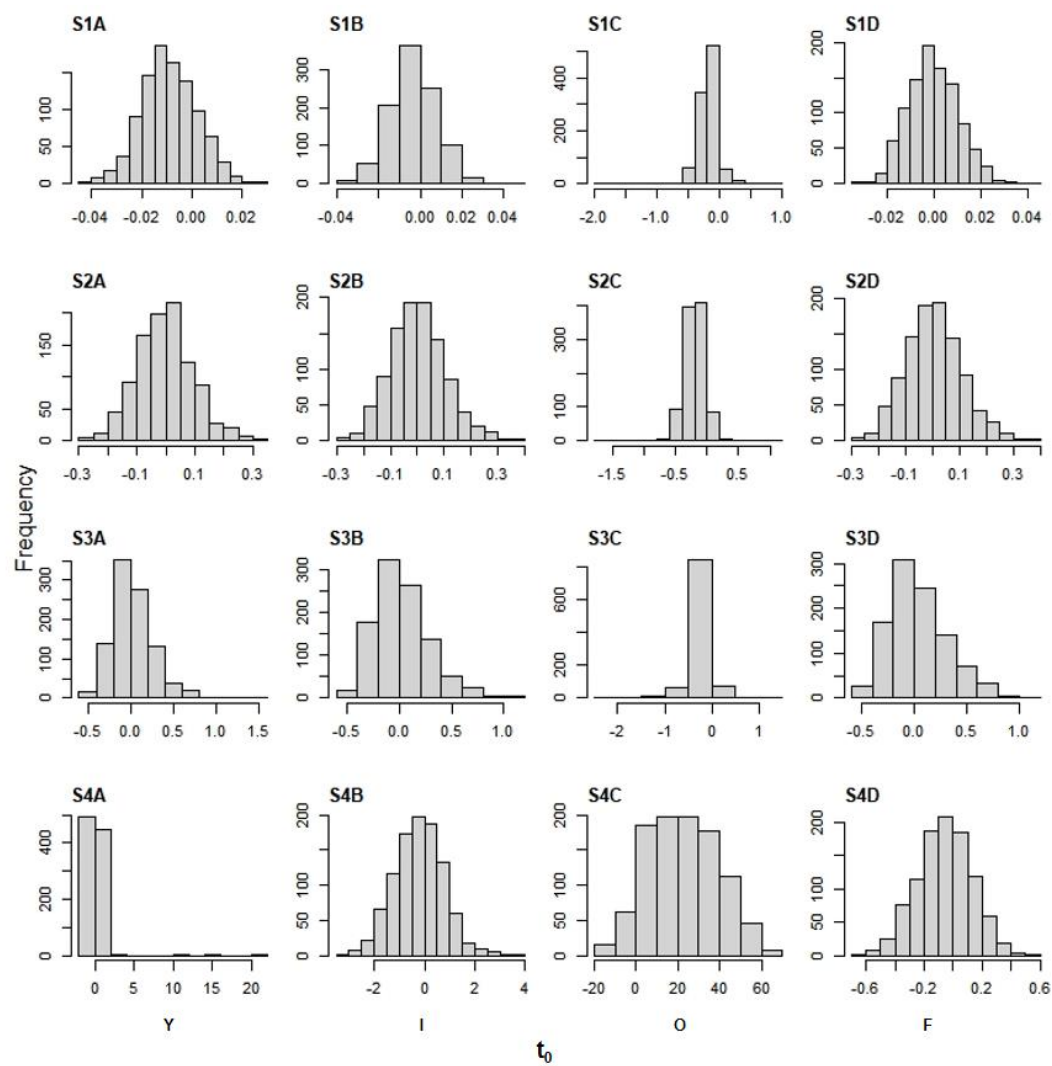

**Figure S13.** Distributions of estimated relative error of  $t_0$  of southern bluefin tuna.

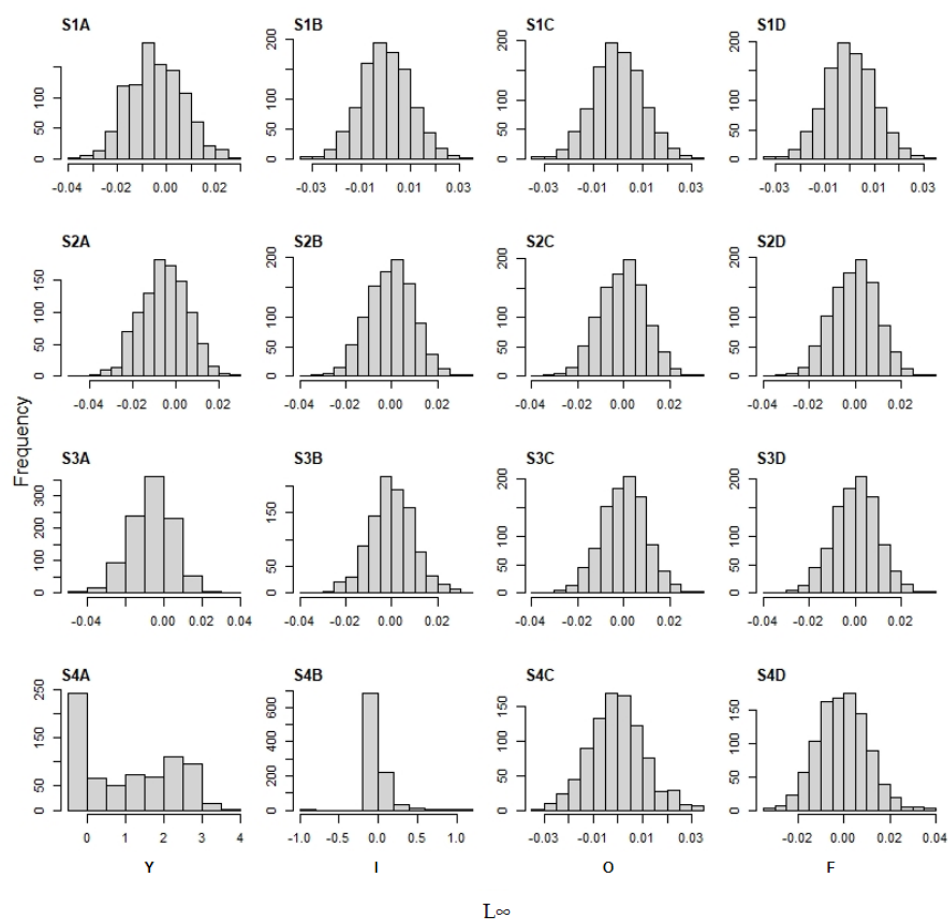

**Figure S14.** Distributions of estimated relative error of  $L_{\infty}$  of yellowfin tuna.

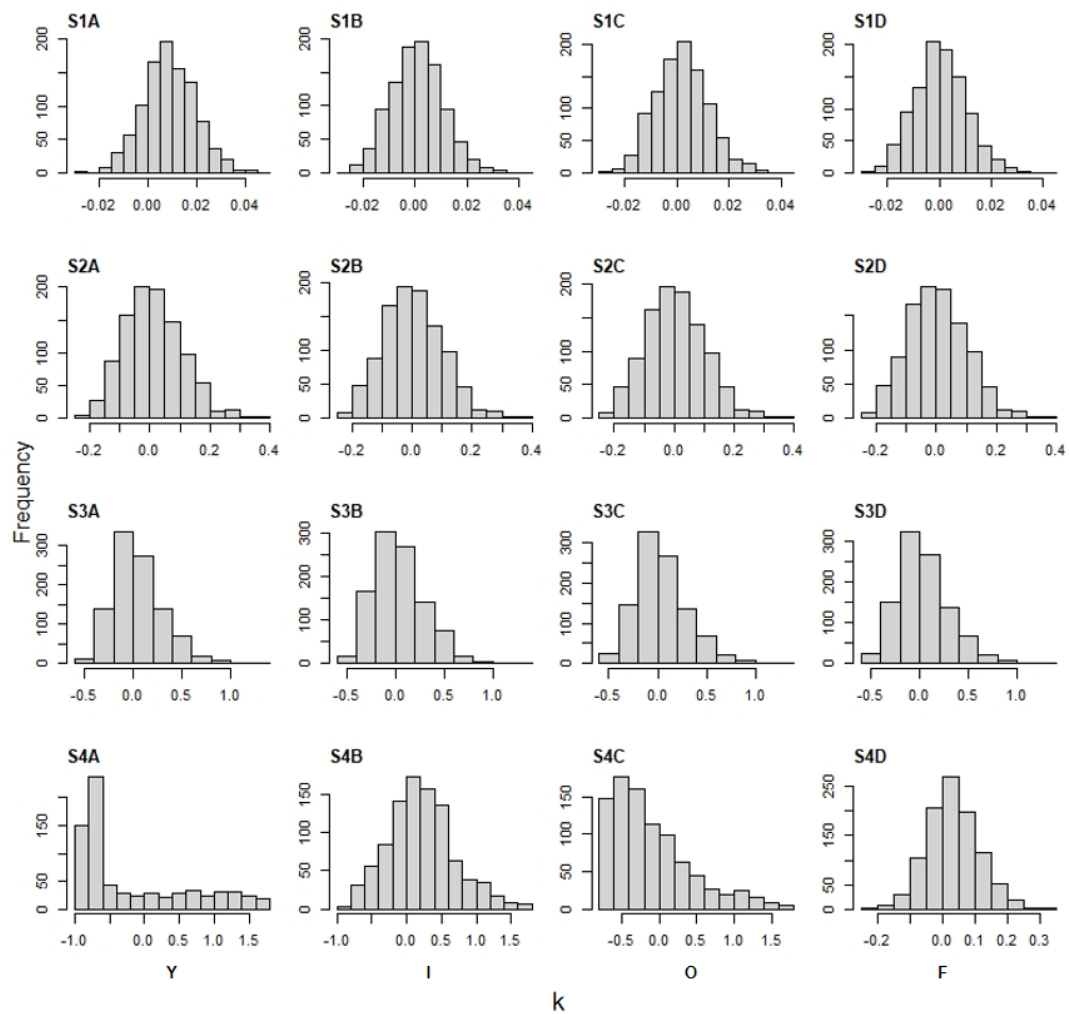

**Figure S15.** Distributions of estimated relative error of  $k$  of yellowfin tuna.

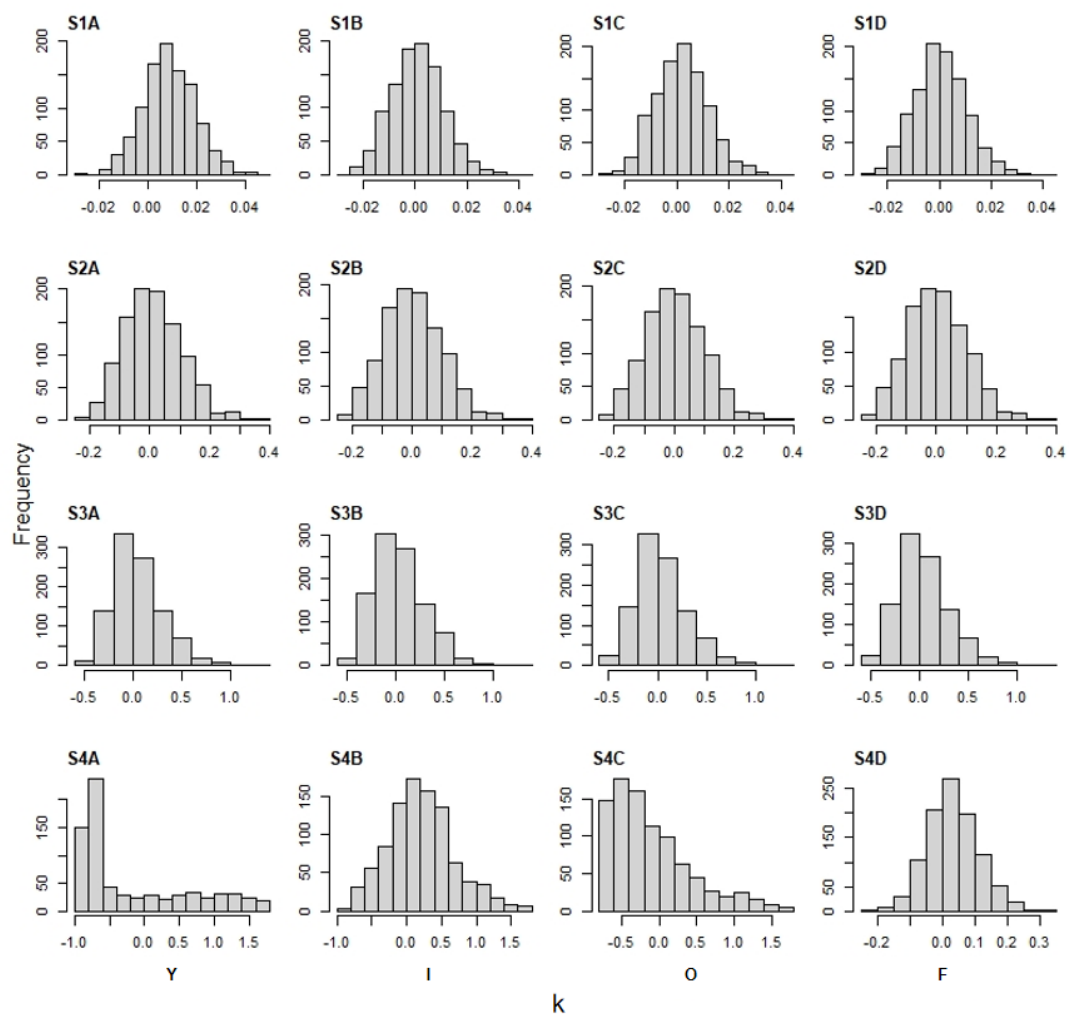

**Figure S16.** Distributions of estimated relative error of  $t_0$  of yellowfin tuna.



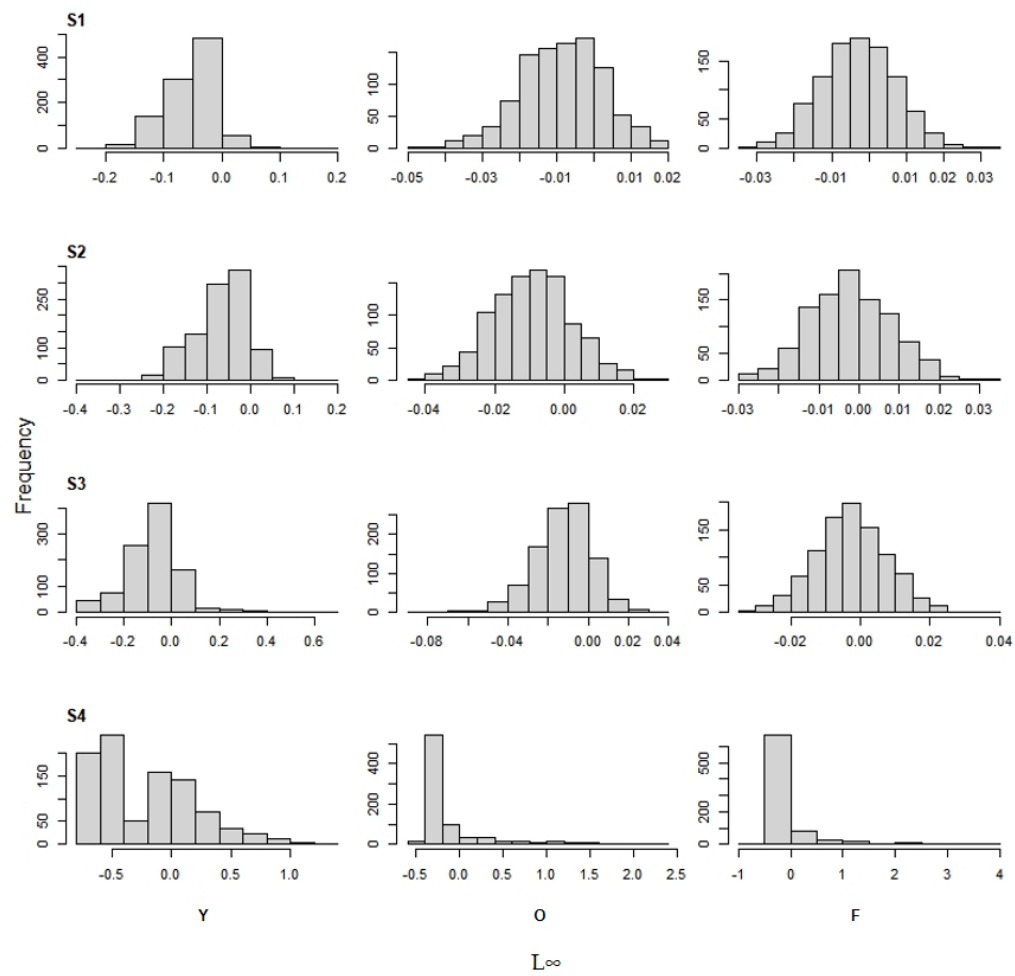

**Figure S17.** Distributions of estimated relative error of  $L_{\infty}$  of skipjack tuna.

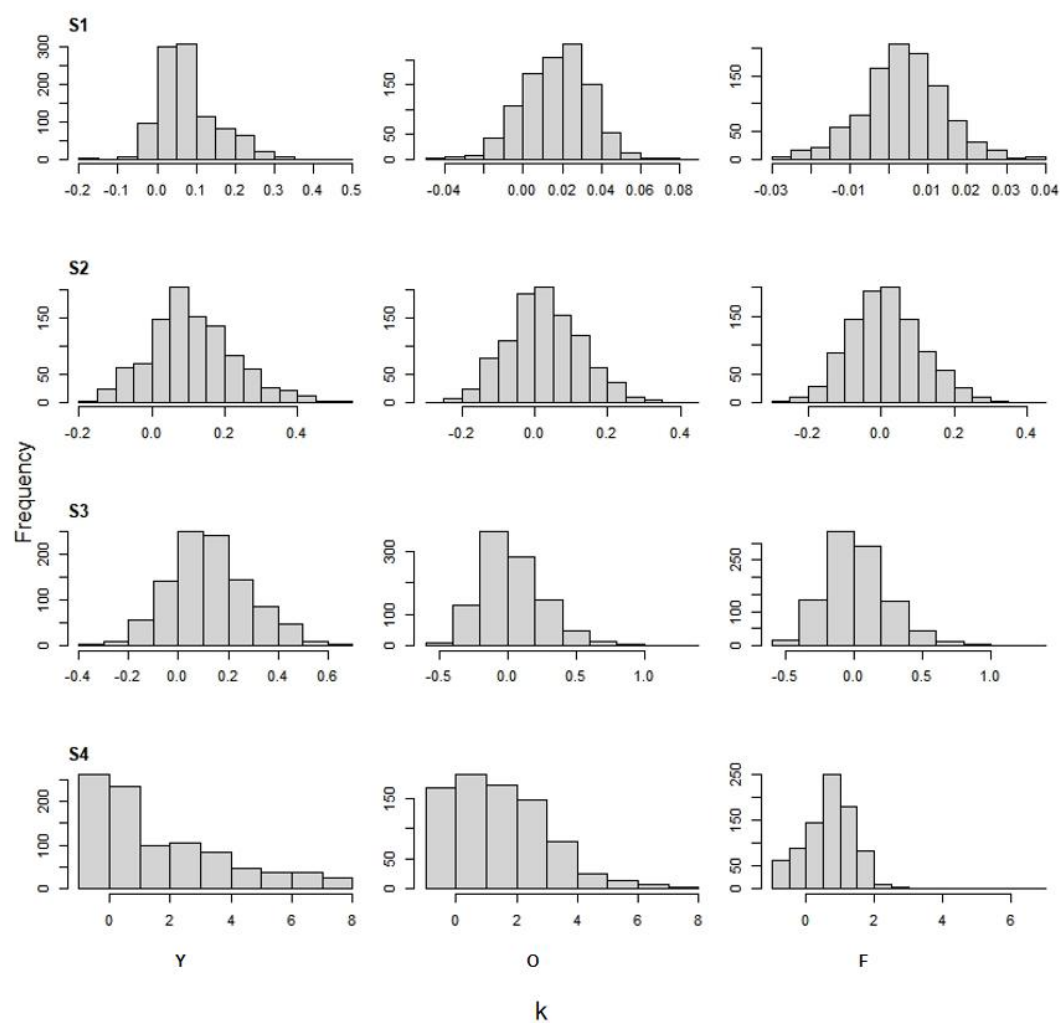

**Figure S18.** Distributions of estimated relative error of  $k$  of skipjack tuna.

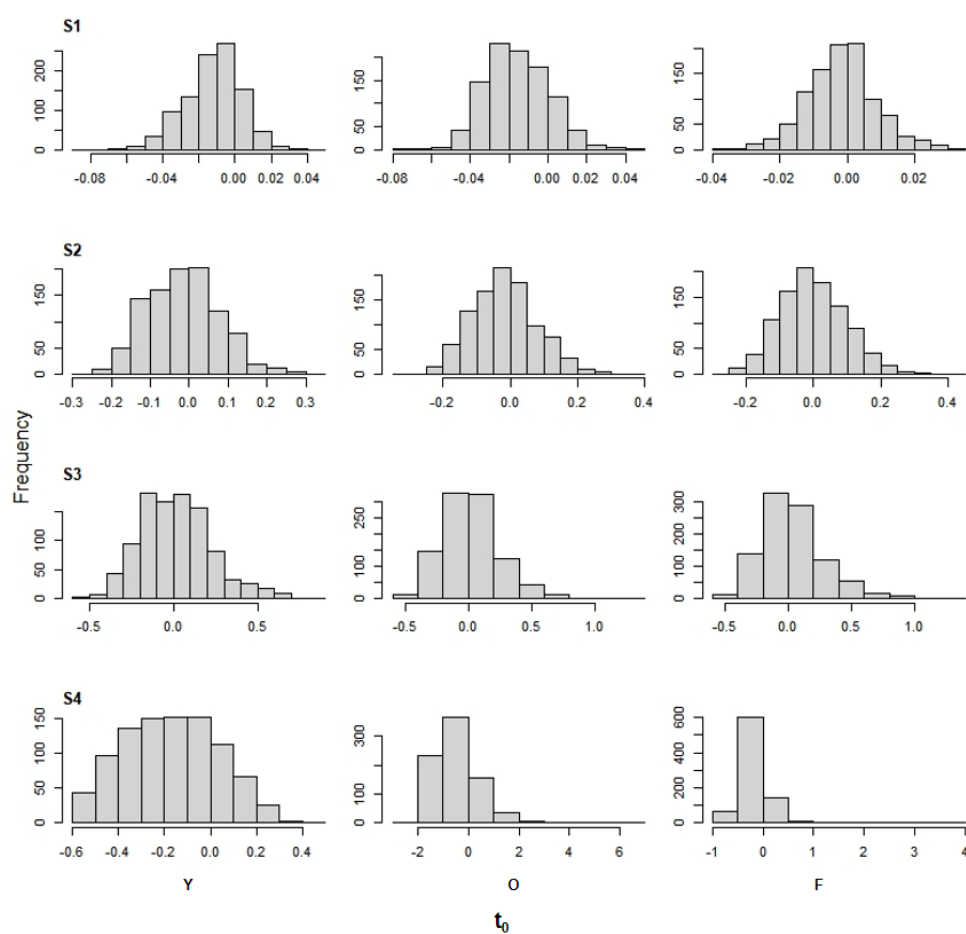

**Figure S19.** Distributions of estimated relative error of  $t_0$  of skipjack tuna.

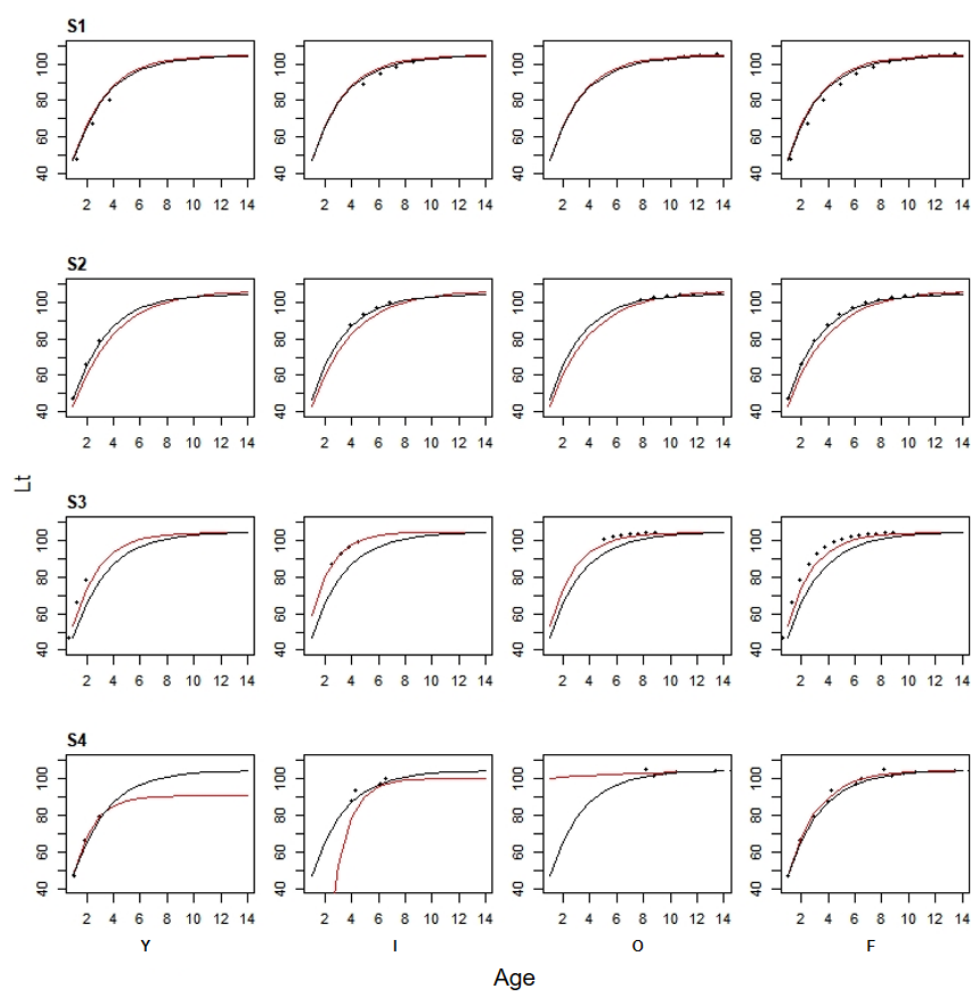

**Figure S20.** A fitted curve (red line) and actual curve of length-at-age (black line) (black dots are the noise data).

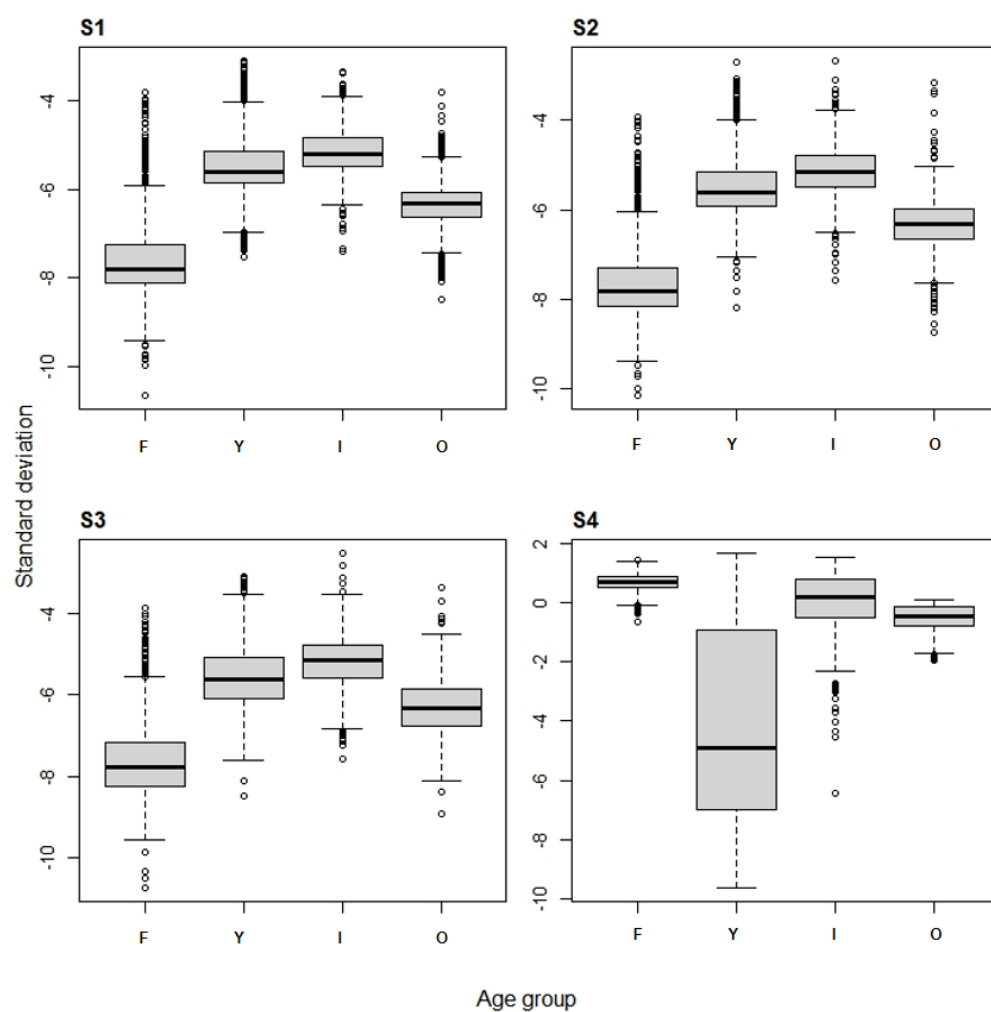

Figure S21. Standard deviation estimated from each model of albacore.

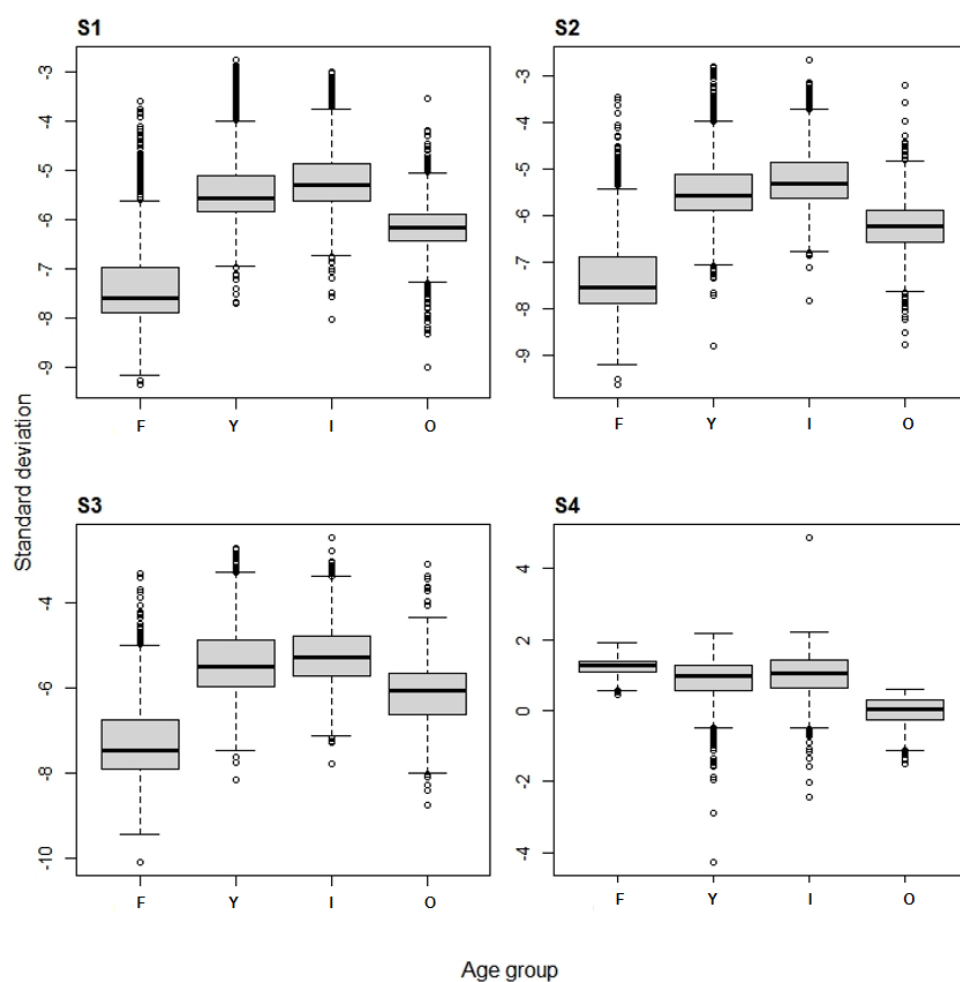

**Figure S22.** Standard deviation estimated from each model of bigeye tuna.

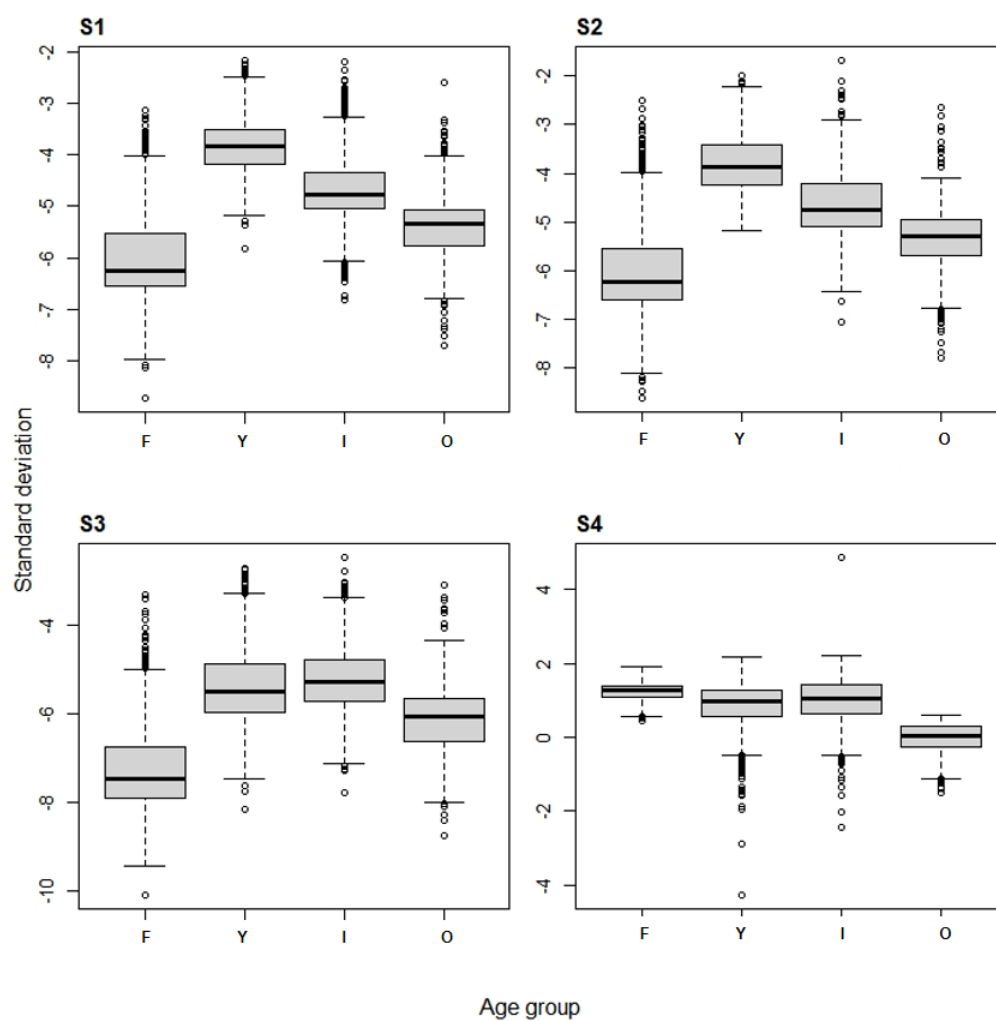

Figure S23. Standard deviation estimated from each model of southern bluefin tuna.

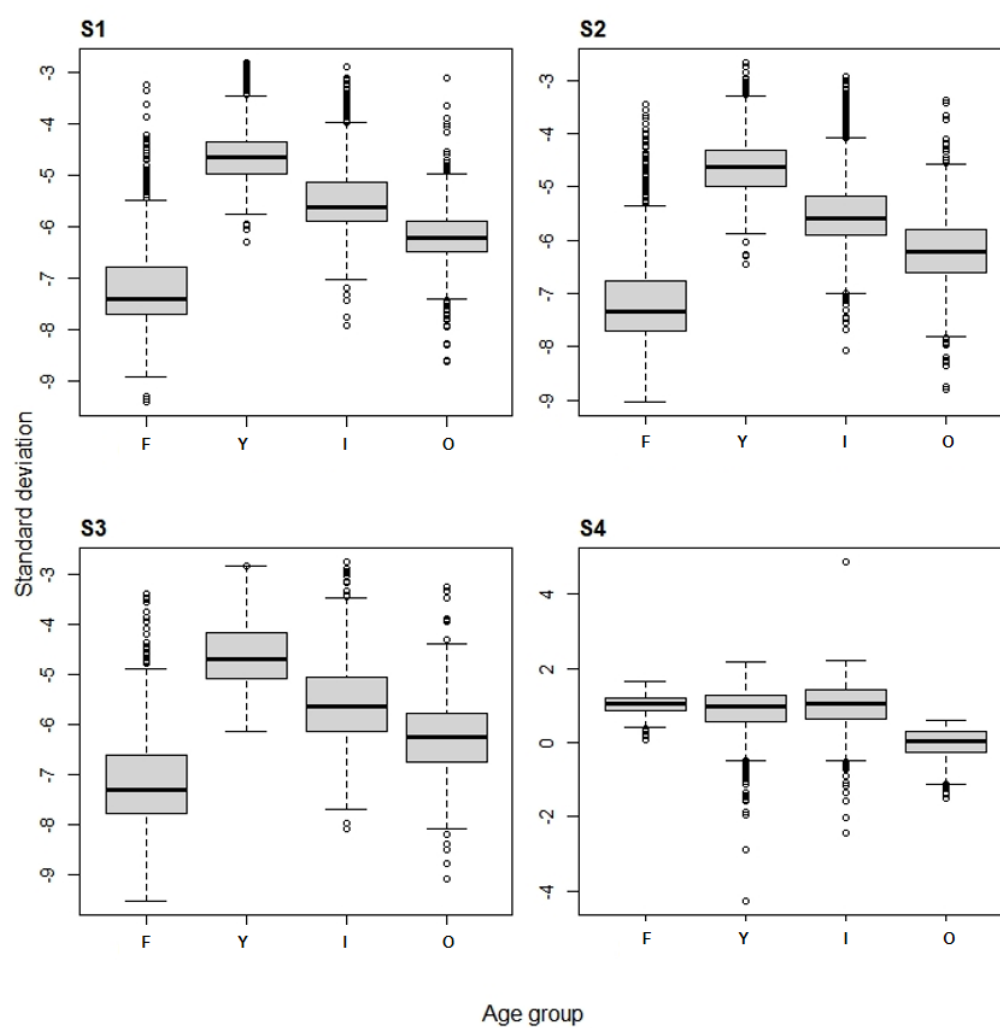

**Figure S24.** Standard deviation estimated from each model of yellowfin tuna.



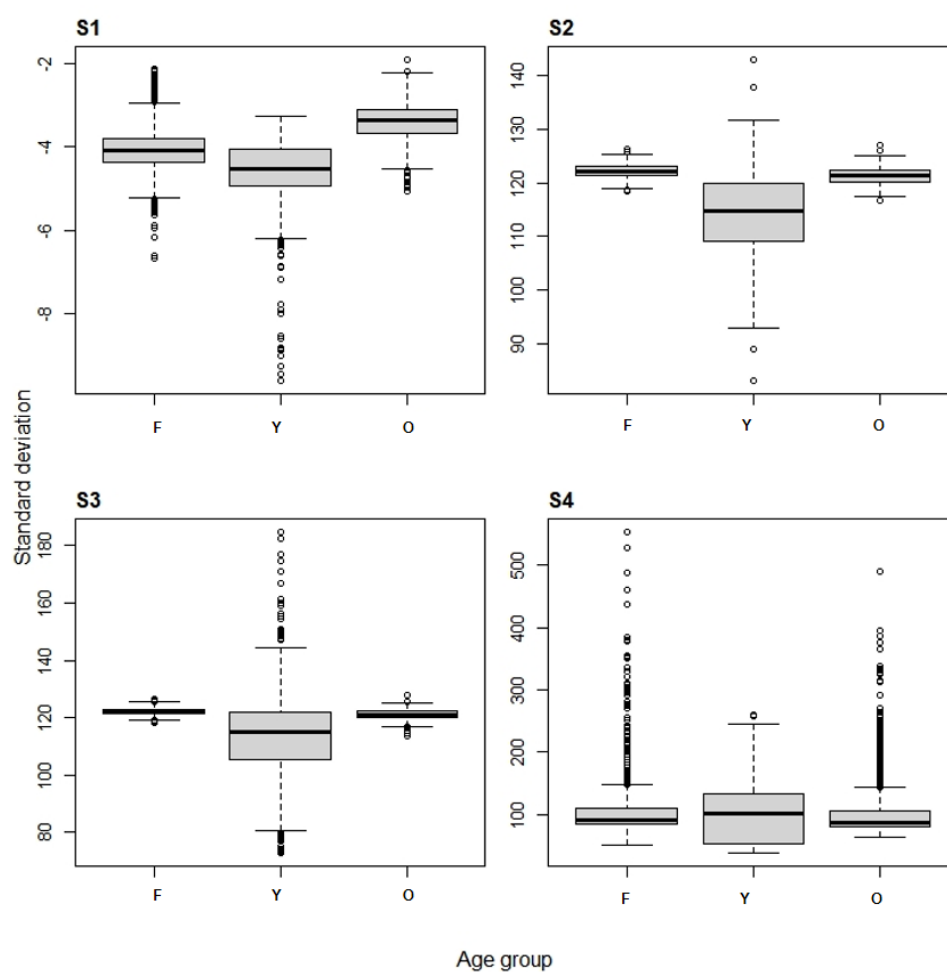

**Figure S25.** Standard deviation estimated from each model of skipjack tuna.
